# Supplementary material for: MtDNA Analysis Indicates Human-Induced Temporal Changes of Serbian Honey Bees Diversity
Source: MDPI journal article supplement (doi:10.3390/insects12090767), 2021-08-27
Supplement: s1 [file s1]

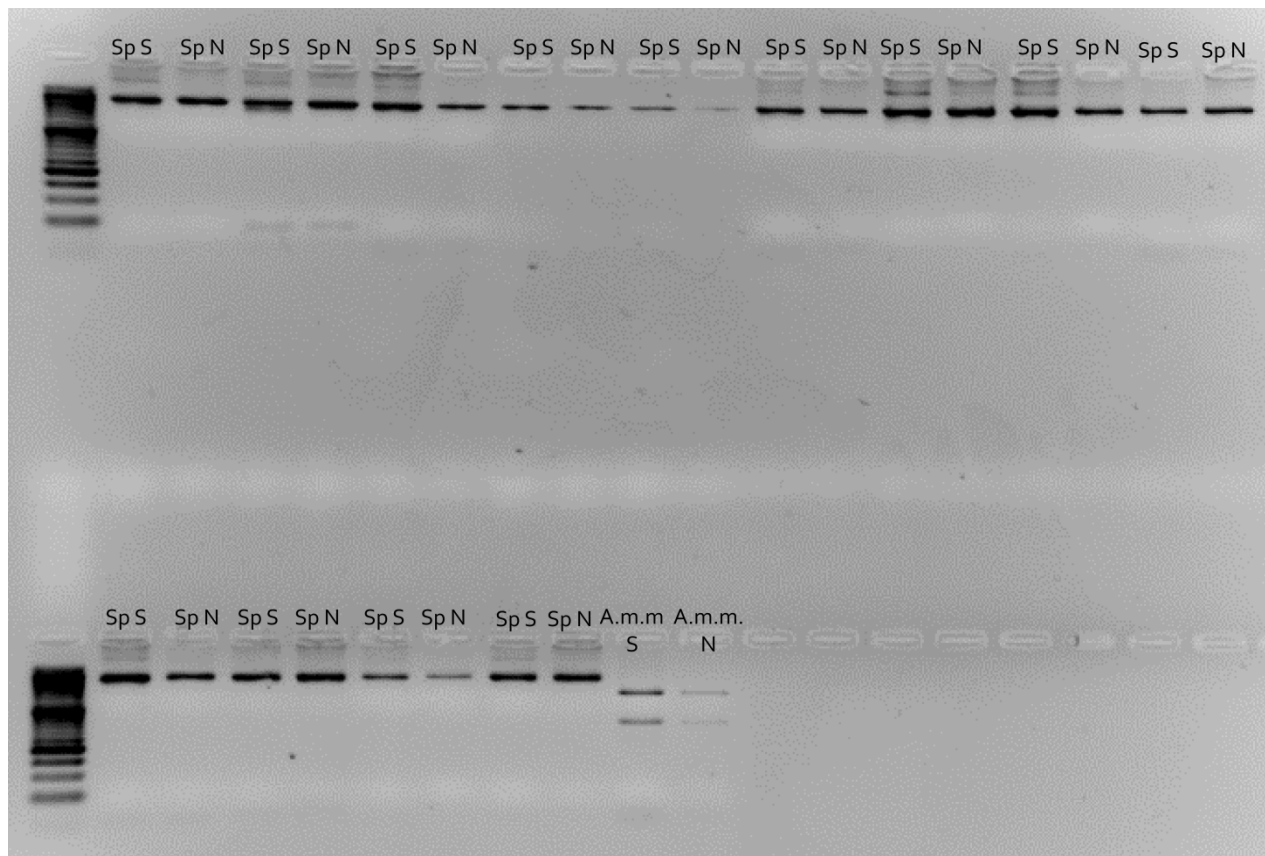

**Figure S1.** PCR-RFLP analysis of the COI-COII fragment digested with *StyI* (S) and *NcoI* (N) enzymes, Sp – sample, A.m.m. – positive control of *Apis mellifera macedonica* digested with the same set of enzymes. The *A. m. macedonica* samples were provided by the Leonidas Haristos from the Division of Apiculture, Hellenic Agricultural Organization ‘Demeter’.

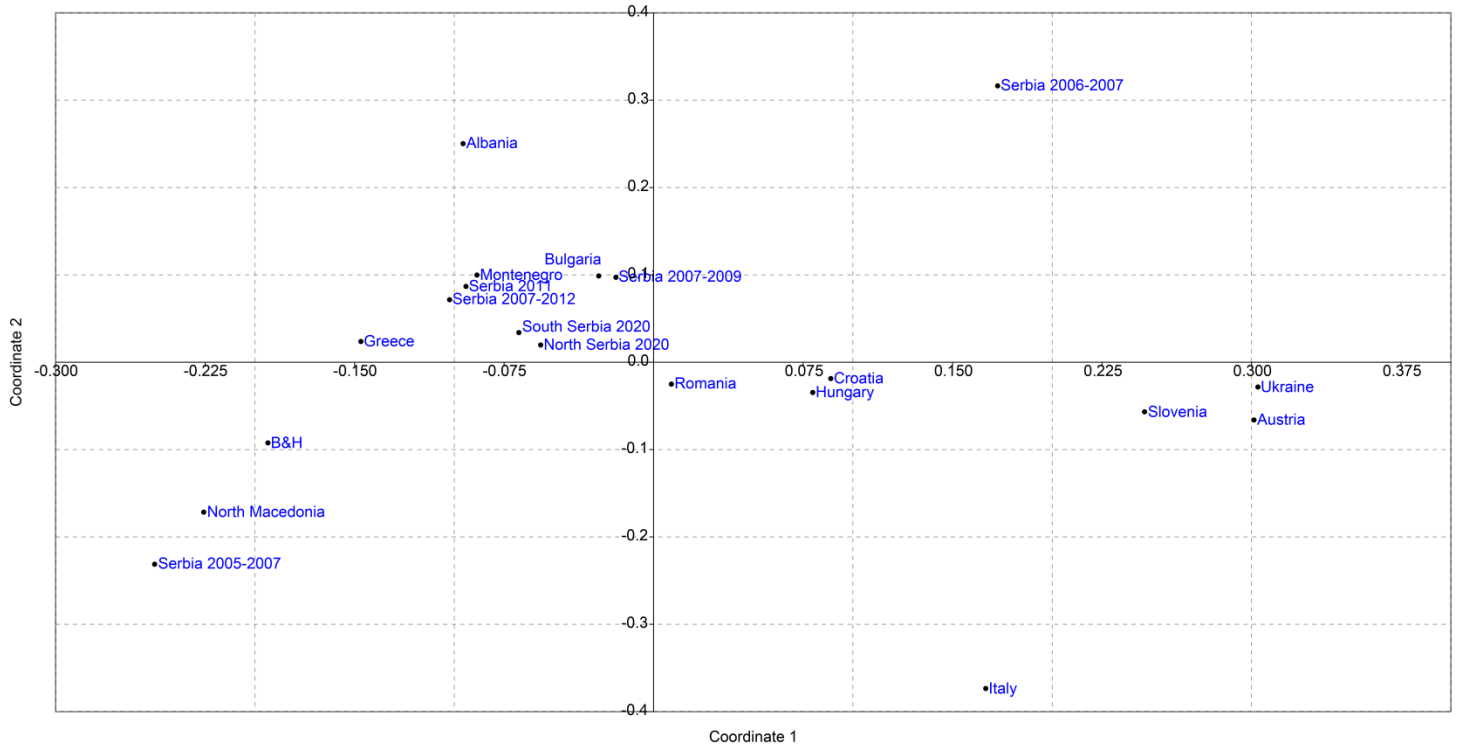

**Figure S2.** Non-metric multidimensional scaling plot of  $F_{ST}$  pairwise distances between the *A. mellifera* population of Serbia, two regions (North and South) and historical data from different time periods (2005-2007, 2006-2007, 2007-2012, 2011), and other *A. mellifera* populations based on the analysis of the variability of *tRNA<sup>leu</sup>-cox2* intergenic region. The goodness of fit is expressed with the stress value which is 0.1567 for this data set. Population pairwise  $F_{ST}$  values are presented in Table S5.

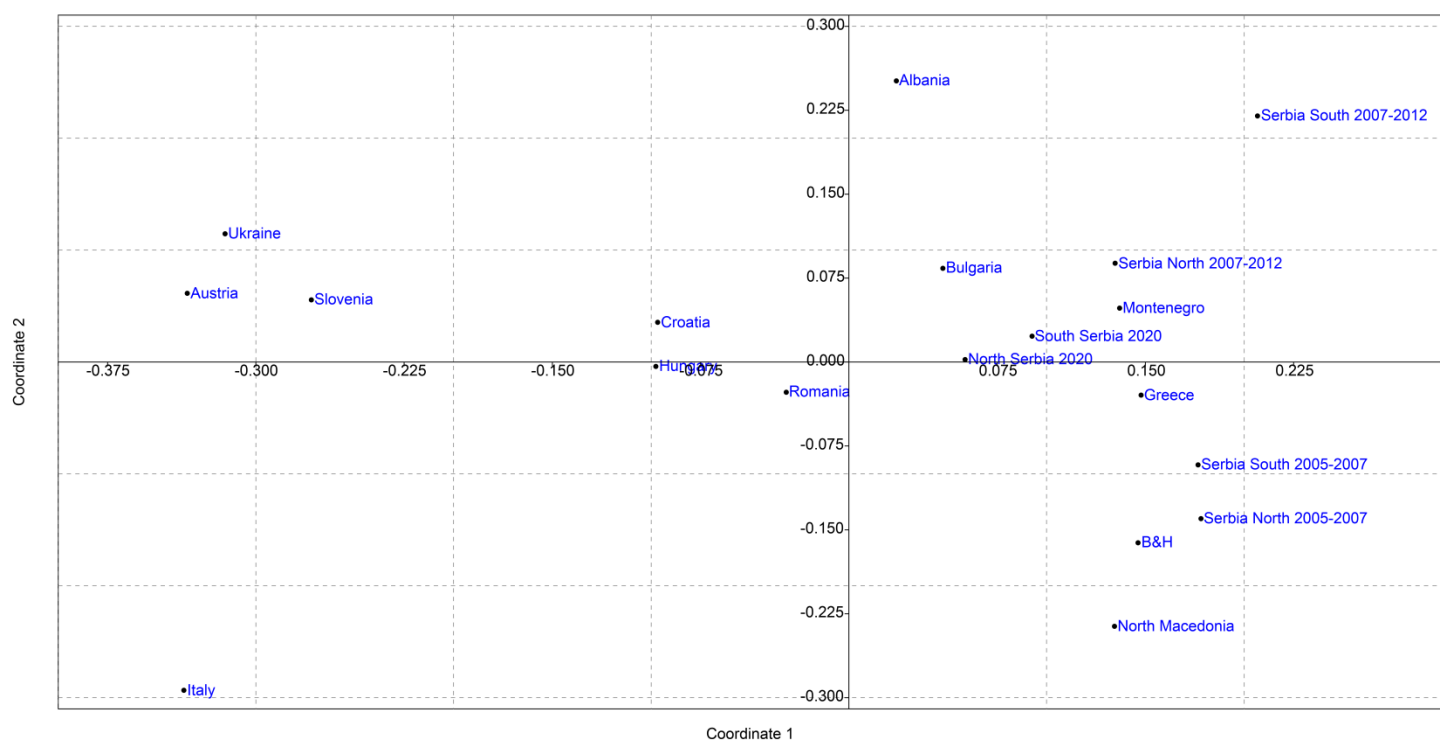

**Figure S3.** Non-metric multidimensional scaling plot of  $F_{ST}$  pairwise distances between the *A. mellifera* population of Serbia, two regions (North and South) and historical data from different time periods for the region of North and South Serbia (2005-2007, 2007-2012), and other *A. mellifera* populations based on the analysis of the variability of  $tRNA^{leu-cox2}$  intergenic region. The goodness of fit is expressed with the stress value which is 0.1395 for this data set. Population pairwise  $F_{ST}$  values are presented in Table S5.

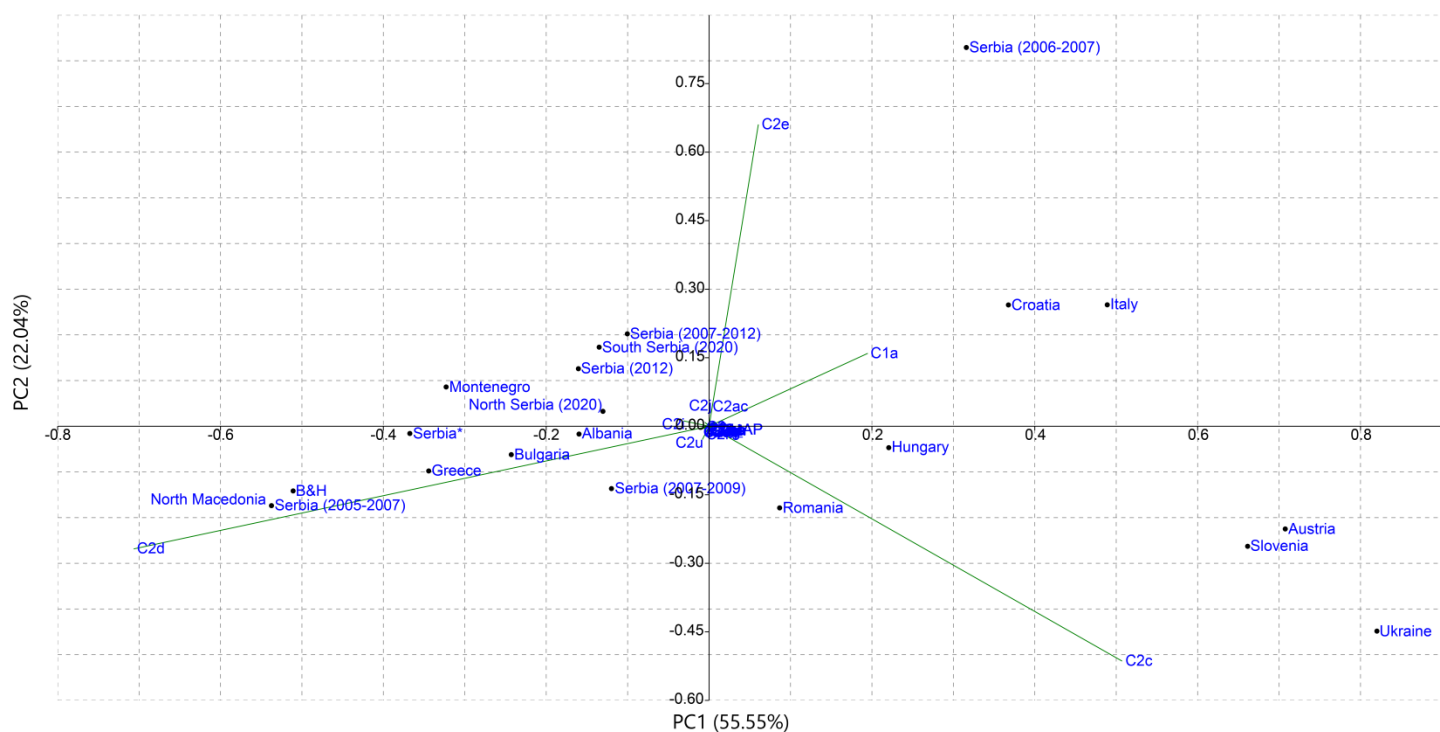

**Figure S4.** PC analysis based on mtDNA haplogroup frequencies in different *A. mellifera* populations. Samples for Serbia are presented as historical data from different time periods (2005-2007, 2006-2007, 2007-2012, 2011). The contribution of each haplogroup to the PCs is shown with green lines. Frequencies of mtDNA haplogroups and references are listed in Table S2 and S6.

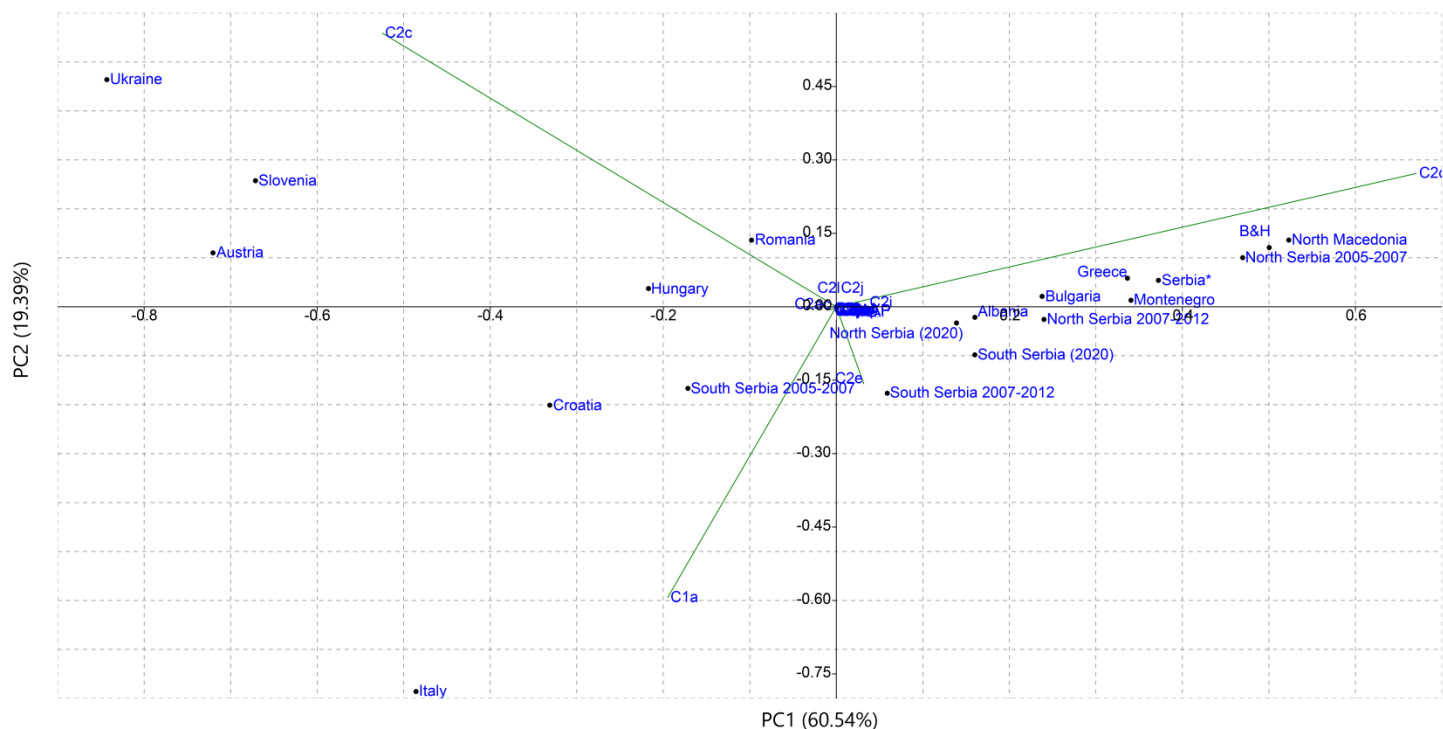

**Figure S5.** PC analysis based on mtDNA haplogroup frequencies in different *A. mellifera* populations. Samples for Serbia are presented as historical data from different time periods and regions of North and South Serbia (2005-2007, 2007-2012). The contribution of each haplogroup to the PCs is shown with green lines. Frequencies of mtDNA haplogroups and references are listed in Table S2 and S6-S7.
