# Supplementary material for: MtDNA Analysis Indicates Human-Induced Temporal Changes of Serbian Honey Bees Diversity
Source: Insects. 2021 Aug 27;12(9):767. doi: 10.3390/insects12090767 (PMC8472511; doi:10.3390/insects12090767)
Supplement: Supplementary file 1 [file insects-12-00767-s001.zip › Table S1-S9.xlsx]

## Sheet: S1
Table S1. List of locations and appiaries from which the sampling was performed. Haplotypes detected in each beehive are presented as well.
Sample ID	Location	Locality	Sampling date	Coordinates	Altitude	Appiary	Haplotype
11_AP_JS	Gornja Bunuša	Leskovac (L)	2020-08-10	42˚53'36.5"N 021˚51'50.8"E	302m	No. 1	C2e
12_AP_JS	Gornja Bunuša	Leskovac (L)	2020-08-10	42˚53'36.5"N 021˚51'50.8"E	302m	No. 1	C2e
13_AP_JS	Gornja Bunuša	Leskovac (L)	2020-08-10	42˚53'36.5"N 021˚51'50.8"E	302m	No. 1	C2d
14_AP_JS	Gornja Bunuša	Leskovac (L)	2020-08-10	42˚53'36.5"N 021˚51'50.8"E	302m	No. 1	C2d
15_AP_JS	Gornja Bunuša	Leskovac (L)	2020-08-10	42˚53'36.5"N 021˚51'50.8"E	302m	No. 1	C2d
21_AP_JS	Vučje	Leskovac (L)	2020-08-10	42°51'30.5"N 21°54'45.1"E	334m	No. 2	C2e
22_AP_JS	Vučje	Leskovac (L)	2020-08-10	42°51'30.5"N 21°54'45.1"E	334m	No. 2	C2e
23_AP_JS	Vučje	Leskovac (L)	2020-08-10	42°51'30.5"N 21°54'45.1"E	334m	No. 2	C2e
24_AP_JS	Vučje	Leskovac (L)	2020-08-10	42°51'30.5"N 21°54'45.1"E	334m	No. 2	C2e
25_AP_JS	Vučje	Leskovac (L)	2020-08-10	42°51'30.5"N 21°54'45.1"E	334m	No. 2	C2e
31_AP_JS	Tumba	Leskovac (L)	2020-08-11	42°45'34.11"N 21°54'13.96"E	1077m	No. 3	C2e
32_AP_JS	Tumba	Leskovac (L)	2020-08-11	42°45'34.11"N 21°54'13.96"E	1077m	No. 3	C2e
33_AP_JS	Tumba	Leskovac (L)	2020-08-11	42°45'34.11"N 21°54'13.96"E	1077m	No. 3	C2e
34_AP_JS	Tumba	Leskovac (L)	2020-08-11	42°45'34.11"N 21°54'13.96"E	1077m	No. 3	C2e
35_AP_JS	Tumba	Leskovac (L)	2020-08-11	42°45'34.11"N 21°54'13.96"E	1077m	No. 3	C2e
36_AP_JS	Tumba	Leskovac (L)	2020-08-11	42°45'34.11"N 21°54'13.96"E	1077m	No. 3	C2e
37_AP_JS	Tumba	Leskovac (L)	2020-08-11	42°45'34.11"N 21°54'13.96"E	1077m	No. 3	C2e
38_AP_JS	Tumba	Leskovac (L)	2020-08-11	42°45'34.11"N 21°54'13.96"E	1077m	No. 3	C2e
41_AP_JS	Šutilnica	Leskovac (L)	2020-08-11	42°50'48.30"N 21°54'57.39"E	517m	No. 4	C2d
42_AP_JS	Šutilnica	Leskovac (L)	2020-08-11	42°50'48.30"N 21°54'57.39"E	517m	No. 4	C2e
43_AP_JS	Šutilnica	Leskovac (L)	2020-08-11	42°50'48.30"N 21°54'57.39"E	517m	No. 4	C2e
44_AP_JS	Šutilnica	Leskovac (L)	2020-08-11	42°50'48.30"N 21°54'57.39"E	517m	No. 4	C2e
45_AP_JS	Šutilnica	Leskovac (L)	2020-08-11	42°50'48.30"N 21°54'57.39"E	517m	No. 4	C2e
56_AP_JS	Miroševce (Orašje)	Leskovac (L)	2020-08-11	42°51'16.1"N 21°50'11.3"E	287m	No. 5	C2d
57_AP_JS	Miroševce (Orašje)	Leskovac (L)	2020-08-11	42°51'16.1"N 21°50'11.3"E	287m	No. 5	C2e
58_AP_JS	Miroševce (Orašje)	Leskovac (L)	2020-08-11	42°51'16.1"N 21°50'11.3"E	287m	No. 5	C2e
59_AP_JS	Miroševce (Orašje)	Leskovac (L)	2020-08-11	42°51'16.1"N 21°50'11.3"E	287m	No. 5	C2d
60_AP_JS	Miroševce (Orašje)	Leskovac (L)	2020-08-11	42°51'16.1"N 21°50'11.3"E	287m	No. 5	C2e
61_AP_JS	Vučje	Leskovac (L)	2020-08-11	42°52'40.7"N 21°55'27.7"E	301m	No. 6	C2d
62_AP_JS	Vučje	Leskovac (L)	2020-08-11	42°52'40.7"N 21°55'27.7"E	301m	No. 6	C2d
63_AP_JS	Vučje	Leskovac (L)	2020-08-11	42°52'40.7"N 21°55'27.7"E	301m	No. 6	C2d
64_AP_JS	Vučje	Leskovac (L)	2020-08-11	42°52'40.7"N 21°55'27.7"E	301m	No. 6	C2d
65_AP_JS	Vučje	Leskovac (L)	2020-08-11	42°52'40.7"N 21°55'27.7"E	301m	No. 6	C2d
66_AP_JS	Vučje	Leskovac (L)	2020-08-11	42°52'40.7"N 21°55'27.7"E	301m	No. 6	C2d
67_AP_JS	Vučje	Leskovac (L)	2020-08-11	42°52'40.7"N 21°55'27.7"E	301m	No. 6	C2d
68_AP_JS	Vučje	Leskovac (L)	2020-08-11	42°52'40.7"N 21°55'27.7"E	301m	No. 6	C2c
69_AP_JS	Vučje	Leskovac (L)	2020-08-11	42°52'40.7"N 21°55'27.7"E	301m	No. 6	C2d
71_AP_JS	Tumba - Golema Arnica	Leskovac (L)	2020-08-12	42°44'51.5"N 21°54'15.4"E	1009 m	No. 7	C1a
72_AP_JS	Tumba - Golema Arnica	Leskovac (L)	2020-08-12	42°44'51.5"N 21°54'15.4"E	1009 m	No. 7	C1a
73_AP_JS	Tumba - Golema Arnica	Leskovac (L)	2020-08-12	42°44'51.5"N 21°54'15.4"E	1009 m	No. 7	C1a
75_AP_JS	Tumba - Golema Arnica	Leskovac (L)	2020-08-12	42°44'51.5"N 21°54'15.4"E	1009 m	No. 7	C1a
77_AP_JS	Tumba - Golema Arnica	Leskovac (L)	2020-08-12	42°44'51.5"N 21°54'15.4"E	1009 m	No. 7	C1a
81_AP_JS	Grdelica - Dedina bara	Leskovac (L)	2020-08-12	42°53'12.1"N 22°06'13.7"E	594m	No. 8	C2d
82_AP_JS	Grdelica - Dedina bara	Leskovac (L)	2020-08-12	42°53'12.1"N 22°06'13.7"E	594m	No. 8	C2d
83_AP_JS	Grdelica - Dedina bara	Leskovac (L)	2020-08-12	42°53'12.1"N 22°06'13.7"E	594m	No. 8	C2d
84_AP_JS	Grdelica - Dedina bara	Leskovac (L)	2020-08-12	42°53'12.1"N 22°06'13.7"E	594m	No. 8	C2c
85_AP_JS	Grdelica - Dedina bara	Leskovac (L)	2020-08-12	42°53'12.1"N 22°06'13.7"E	594m	No. 8	C2d
91_AP_JS	Boćevica, Grdelička klisura	Leskovac (L)	2020-08-12	42°52'21.7"N 22°06'18.8"E	295m	No. 9	C2c
93_AP_JS	Boćevica, Grdelička klisura	Leskovac (L)	2020-08-12	42°52'21.7"N 22°06'18.8"E	295m	No. 9	C2d
94_AP_JS	Boćevica, Grdelička klisura	Leskovac (L)	2020-08-12	42°52'21.7"N 22°06'18.8"E	295m	No. 9	C2d
98_AP_JS	Boćevica, Grdelička klisura	Leskovac (L)	2020-08-12	42°52'21.7"N 22°06'18.8"E	295m	No. 9	C2d
99_AP_JS	Boćevica, Grdelička klisura	Leskovac (L)	2020-08-12	42°52'21.7"N 22°06'18.8"E	295m	No. 9	C2d
100_AP_JS	Alakince	Vlasina (V)	2020-08-13	42°41'47.0"N 22°08'19.4"E	425m	No. 10	C2d
101_AP_JS	Alakince	Vlasina (V)	2020-08-13	42°41'47.0"N 22°08'19.4"E	425m	No. 10	C1a
102_AP_JS	Alakince	Vlasina (V)	2020-08-13	42°41'47.0"N 22°08'19.4"E	425m	No. 10	C2e
103_AP_JS	Alakince	Vlasina (V)	2020-08-13	42°41'47.0"N 22°08'19.4"E	425m	No. 10	C1a
104_AP_JS	Alakince	Vlasina (V)	2020-08-13	42°41'47.0"N 22°08'19.4"E	425m	No. 10	C2e
115_AP_JS	Strezimirovci	Vlasina (V)	2020-08-13	42°48'00.1"N 22°26'32.2"E	839m	No. 11	C2d
116_AP_JS	Strezimirovci	Vlasina (V)	2020-08-13	42°48'00.1"N 22°26'32.2"E	839m	No. 11	C2e
117_AP_JS	Strezimirovci	Vlasina (V)	2020-08-13	42°48'00.1"N 22°26'32.2"E	839m	No. 11	C2d
118_AP_JS	Strezimirovci	Vlasina (V)	2020-08-13	42°48'00.1"N 22°26'32.2"E	839m	No. 11	C2e
119_AP_JS	Strezimirovci	Vlasina (V)	2020-08-13	42°48'00.1"N 22°26'32.2"E	839m	No. 11	C2d
123_AP_JS	Bresnica, Bosilegrad	Vlasina (V)	2020-08-13	42°26'25.1"N 22°28'07.7"E	837m	No. 12	C2d
124_AP_JS	Bresnica, Bosilegrad	Vlasina (V)	2020-08-13	42°26'25.1"N 22°28'07.7"E	837m	No. 12	C2d
125_AP_JS	Bresnica, Bosilegrad	Vlasina (V)	2020-08-13	42°26'25.1"N 22°28'07.7"E	837m	No. 12	C2d
126_AP_JS	Bresnica, Bosilegrad	Vlasina (V)	2020-08-13	42°26'25.1"N 22°28'07.7"E	837m	No. 12	C2d
128_AP_JS	Bresnica, Bosilegrad	Vlasina (V)	2020-08-13	42°26'25.1"N 22°28'07.7"E	837m	No. 12	C2e
131_AP_JS	Tegošnica	Tromeđa (T)	2020-08-14	42°56'48.1"N 22°18'21.2"E	378m	No. 13	C2d
132_AP_JS	Tegošnica	Tromeđa (T)	2020-08-14	42°56'48.1"N 22°18'21.2"E	378m	No. 13	C2d
133_AP_JS	Tegošnica	Tromeđa (T)	2020-08-14	42°56'48.1"N 22°18'21.2"E	378m	No. 13	C2d
134_AP_JS	Tegošnica	Tromeđa (T)	2020-08-14	42°56'48.1"N 22°18'21.2"E	378m	No. 13	C2d
135_AP_JS	Tegošnica	Tromeđa (T)	2020-08-14	42°56'48.1"N 22°18'21.2"E	378m	No. 13	C2e
141_AP_JS	Dobroviš	Tromeđa (T)	2020-08-14	42°57'08.5"N 22°20'06.8"E	631m	No. 14	C2d
142_AP_JS	Dobroviš	Tromeđa (T)	2020-08-14	42°57'08.5"N 22°20'06.8"E	631m	No. 14	C2d
143_AP_JS	Dobroviš	Tromeđa (T)	2020-08-14	42°57'08.5"N 22°20'06.8"E	631m	No. 14	C2d
144_AP_JS	Dobroviš	Tromeđa (T)	2020-08-14	42°57'08.5"N 22°20'06.8"E	631m	No. 14	C2e
145_AP_JS	Dobroviš	Tromeđa (T)	2020-08-14	42°57'08.5"N 22°20'06.8"E	631m	No. 14	C2d
146_AP_JS	Dobroviš	Tromeđa (T)	2020-08-14	42°57'08.5"N 22°20'06.8"E	631m	No. 14	C2d
147_AP_JS	Dobroviš	Tromeđa (T)	2020-08-14	42°57'08.5"N 22°20'06.8"E	631m	No. 14	C2d
148_AP_JS	Dobroviš	Tromeđa (T)	2020-08-14	42°57'08.5"N 22°20'06.8"E	631m	No. 14	C2d
149_AP_JS	Dobroviš	Tromeđa (T)	2020-08-14	42°57'08.5"N 22°20'06.8"E	631m	No. 14	C2d
150_AP_JS	Dobroviš	Tromeđa (T)	2020-08-14	42°57'08.5"N 22°20'06.8"E	631m	No. 14	C2i
161_AP_JS	Šugrin	Stara Planina (SP)	2020-08-15	43°20'48.3"N 22°27'49.4"E	615m	No. 15	C2j
163_AP_JS	Šugrin	Stara Planina (SP)	2020-08-15	43°20'48.3"N 22°27'49.4"E	615m	No. 15	C1a
165_AP_JS	Šugrin	Stara Planina (SP)	2020-08-15	43°20'48.3"N 22°27'49.4"E	615m	No. 15	C1a
167_AP_JS	Šugrin	Stara Planina (SP)	2020-08-15	43°20'48.3"N 22°27'49.4"E	615m	No. 15	C2d
170_AP_JS	Šugrin	Stara Planina (SP)	2020-08-15	43°20'48.3"N 22°27'49.4"E	615m	No. 15	C1a
171_AP_JS	Rakita	Stara Planina (SP)	2020-08-15	42°54'48.7"N 22°33'13.9"E	817m	No. 16	C2d
172_AP_JS	Rakita	Stara Planina (SP)	2020-08-15	42°54'48.7"N 22°33'13.9"E	817m	No. 16	C2e
173_AP_JS	Rakita	Stara Planina (SP)	2020-08-15	42°54'48.7"N 22°33'13.9"E	817m	No. 16	C2d
174_AP_JS	Rakita	Stara Planina (SP)	2020-08-15	42°54'48.7"N 22°33'13.9"E	817m	No. 16	C2d
175_AP_JS	Rakita	Stara Planina (SP)	2020-08-15	42°54'48.7"N 22°33'13.9"E	817m	No. 16	C2d
181_AP_JS	Topli Do	Stara Planina (SP)	2020-08-16	43°20'29.7"N 22°40'35.3"E	735m	No. 17	C2d
182_AP_JS	Topli Do	Stara Planina (SP)	2020-08-16	43°20'29.7"N 22°40'35.3"E	735m	No. 17	C2d
183_AP_JS	Topli Do	Stara Planina (SP)	2020-08-16	43°20'29.7"N 22°40'35.3"E	735m	No. 17	C2d
184_AP_JS	Topli Do	Stara Planina (SP)	2020-08-16	43°20'29.7"N 22°40'35.3"E	735m	No. 17	C2d
185_AP_JS	Topli Do	Stara Planina (SP)	2020-08-16	43°20'29.7"N 22°40'35.3"E	735m	No. 17	C2d
191_AP_JS	Sopotski atar	Stara Planina (SP)	2020-08-16	43°12'09.8"N 22°33'36.3"E	374m	No. 18	C2ac
192_AP_JS	Sopotski atar	Stara Planina (SP)	2020-08-16	43°12'09.8"N 22°33'36.3"E	374m	No. 18	C2d
193_AP_JS	Sopotski atar	Stara Planina (SP)	2020-08-16	43°12'09.8"N 22°33'36.3"E	374m	No. 18	C2d
194_AP_JS	Sopotski atar	Stara Planina (SP)	2020-08-16	43°12'09.8"N 22°33'36.3"E	374m	No. 18	C2d
195_AP_JS	Sopotski atar	Stara Planina (SP)	2020-08-16	43°12'09.8"N 22°33'36.3"E	374m	No. 18	C2d
201_AP_JS	Arbinje	Stara Planina (SP)	2020-08-16	43°17'19.2"N 22°46'00.9"E	1042m	No. 19	C2d
202_AP_JS	Arbinje	Stara Planina (SP)	2020-08-16	43°17'19.2"N 22°46'00.9"E	1042m	No. 19	C2d
203_AP_JS	Arbinje	Stara Planina (SP)	2020-08-16	43°17'19.2"N 22°46'00.9"E	1042m	No. 19	C2e
204_AP_JS	Arbinje	Stara Planina (SP)	2020-08-16	43°17'19.2"N 22°46'00.9"E	1042m	No. 19	C2d
205_AP_JS	Arbinje	Stara Planina (SP)	2020-08-16	43°17'19.2"N 22°46'00.9"E	1042m	No. 19	C2d
211_AP_SS	Klještavica, Bosut	Fruška Gora (FG)	2020-09-15	44°57'30"N 19°23'46"E	76m	No. 20	C2d
212_AP_SS	Klještavica, Bosut	Fruška Gora (FG)	2020-09-15	44°57'30"N 19°23'46"E	76m	No. 20	C2d
213_AP_SS	Klještavica, Bosut	Fruška Gora (FG)	2020-09-15	44°57'30"N 19°23'46"E	76m	No. 20	C2e
214_AP_SS	Klještavica, Bosut	Fruška Gora (FG)	2020-09-15	44°57'30"N 19°23'46"E	76m	No. 20	C2d
215_AP_SS	Klještavica, Bosut	Fruška Gora (FG)	2020-09-15	44°57'30"N 19°23'46"E	76m	No. 20	C2d
226_AP_SS	Berkasovo, Šid	Fruška Gora (FG)	2020-09-15	45°09'07.1"N 19°16'37.6"E	127m	No. 21	C2d
227_AP_SS	Berkasovo, Šid	Fruška Gora (FG)	2020-09-15	45°09'07.1"N 19°16'37.6"E	127m	No. 21	C2d
228_AP_SS	Berkasovo, Šid	Fruška Gora (FG)	2020-09-15	45°09'07.1"N 19°16'37.6"E	127m	No. 21	C2ce
229_AP_SS	Berkasovo, Šid	Fruška Gora (FG)	2020-09-15	45°09'07.1"N 19°16'37.6"E	127m	No. 21	C2d
230_AP_SS	Berkasovo, Šid	Fruška Gora (FG)	2020-09-15	45°09'07.1"N 19°16'37.6"E	127m	No. 21	C2d
231_AP_SS	Bačinci (Česmin Do)	Fruška Gora (FG)	2020-09-15	45°07'03,9"N 19°18'30,7"E	172m	No. 22	C2d
232_AP_SS	Bačinci (Česmin Do)	Fruška Gora (FG)	2020-09-15	45°07'03,9"N 19°18'30,7"E	172m	No. 22	C2d
233_AP_SS	Bačinci (Česmin Do)	Fruška Gora (FG)	2020-09-15	45°07'03,9"N 19°18'30,7"E	172m	No. 22	C2d
234_AP_SS	Bačinci (Česmin Do)	Fruška Gora (FG)	2020-09-15	45°07'03,9"N 19°18'30,7"E	172m	No. 22	C2d
235_AP_SS	Bačinci (Česmin Do)	Fruška Gora (FG)	2020-09-15	45°07'03,9"N 19°18'30,7"E	172m	No. 22	C2d
241_AP_SS	Milin Do (Erdevik)	Fruška Gora (FG)	2020-09-15	45°08'24,7"N 19°23'16,1"E	145m	No. 23	C2d
242_AP_SS	Milin Do (Erdevik)	Fruška Gora (FG)	2020-09-15	45°08'24,7"N 19°23'16,1"E	145m	No. 23	C2d
243_AP_SS	Milin Do (Erdevik)	Fruška Gora (FG)	2020-09-15	45°08'24,7"N 19°23'16,1"E	145m	No. 23	C2d
244_AP_SS	Milin Do (Erdevik)	Fruška Gora (FG)	2020-09-15	45°08'24,7"N 19°23'16,1"E	145m	No. 23	C2d
245_AP_SS	Milin Do (Erdevik)	Fruška Gora (FG)	2020-09-15	45°08'24,7"N 19°23'16,1"E	145m	No. 23	C2d
251_AP_SS	Divoš	Fruška Gora (FG)	2020-09-15	45°06'04,0"N 19°30'00,4"E	134m	No. 24	C2d
252_AP_SS	Divoš	Fruška Gora (FG)	2020-09-15	45°06'04,0"N 19°30'00,4"E	134m	No. 24	C2d
253_AP_SS	Divoš	Fruška Gora (FG)	2020-09-15	45°06'04,0"N 19°30'00,4"E	134m	No. 24	C2d
254_AP_SS	Divoš	Fruška Gora (FG)	2020-09-15	45°06'04,0"N 19°30'00,4"E	134m	No. 24	C2c
255_AP_SS	Divoš	Fruška Gora (FG)	2020-09-15	45°06'04,0"N 19°30'00,4"E	134m	No. 24	C2d
261_AP_SS	Vrdnik	Fruška Gora (FG)	2020-09-16	45°08'19,2"N 19°47'00,3"E	240m	No. 25	C2e
263_AP_SS	Vrdnik	Fruška Gora (FG)	2020-09-16	45°08'19,2"N 19°47'00,3"E	240m	No. 25	C2d
264_AP_SS	Vrdnik	Fruška Gora (FG)	2020-09-16	45°08'19,2"N 19°47'00,3"E	240m	No. 25	C2d
268_AP_SS	Vrdnik	Fruška Gora (FG)	2020-09-16	45°08'19,2"N 19°47'00,3"E	240m	No. 25	C2d
281_AP_SS	Turija	Subotica (S)	2020-09-17	45°32'58,8"N 19°52'08,2"E	79m	No. 26	C2e
282_AP_SS	Turija	Subotica (S)	2020-09-17	45°32'58,8"N 19°52'08,2"E	79m	No. 26	C2db
283_AP_SS	Turija	Subotica (S)	2020-09-17	45°32'58,8"N 19°52'08,2"E	79m	No. 26	C2i
287_AP_SS	Turija	Subotica (S)	2020-09-17	45°32'58,8"N 19°52'08,2"E	79m	No. 26	C1a
288_AP_SS	Turija	Subotica (S)	2020-09-17	45°32'58,8"N 19°52'08,2"E	79m	No. 26	C2d
291_AP_SS	Subotica	Subotica (S)	2020-09-18	46°07'44"N 19°41'21"E	115m	No. 27	C2d
292_AP_SS	Subotica	Subotica (S)	2020-09-18	46°07'44"N 19°41'21"E	115m	No. 27	C2e
293_AP_SS	Subotica	Subotica (S)	2020-09-18	46°07'44"N 19°41'21"E	115m	No. 27	C1a
294_AP_SS	Subotica	Subotica (S)	2020-09-18	46°07'44"N 19°41'21"E	115m	No. 27	C2d
295_AP_SS	Subotica	Subotica (S)	2020-09-18	46°07'44"N 19°41'21"E	115m	No. 27	C2d
301_AP_SS	Subotica	Subotica (S)	2020-09-18	46°07'45.4"N 19°40'48.3"E	113m	No. 28	C2d
302_AP_SS	Subotica	Subotica (S)	2020-09-18	46°07'45.4"N 19°40'48.3"E	113m	No. 28	C2d
303_AP_SS	Subotica	Subotica (S)	2020-09-18	46°07'45.4"N 19°40'48.3"E	113m	No. 28	C2d
304_AP_SS	Subotica	Subotica (S)	2020-09-18	46°07'45.4"N 19°40'48.3"E	113m	No. 28	C2i
305_AP_SS	Subotica	Subotica (S)	2020-09-18	46°07'45.4"N 19°40'48.3"E	113m	No. 28	C2c
311_AP_SS	Kelebija	Subotica (S)	2020-09-18	46°09'44"N 19°34'06"E	132m	No. 29	C2d
312_AP_SS	Kelebija	Subotica (S)	2020-09-18	46°09'44"N 19°34'06"E	132m	No. 29	C2d
313_AP_SS	Kelebija	Subotica (S)	2020-09-18	46°09'44"N 19°34'06"E	132m	No. 29	C2c
314_AP_SS	Kelebija	Subotica (S)	2020-09-18	46°09'44"N 19°34'06"E	132m	No. 29	C1a
315_AP_SS	Kelebija	Subotica (S)	2020-09-18	46°09'44"N 19°34'06"E	132m	No. 29	C2d
321_AP_SS	Palić	Subotica (S)	2020-09-18	46°06'58,7"N 19°47'04,8"E	71m	No. 30	C2d
322_AP_SS	Palić	Subotica (S)	2020-09-18	46°06'58,7"N 19°47'04,8"E	71m	No. 30	C2e
323_AP_SS	Palić	Subotica (S)	2020-09-18	46°06'58,7"N 19°47'04,8"E	71m	No. 30	C2d
324_AP_SS	Palić	Subotica (S)	2020-09-18	46°06'58,7"N 19°47'04,8"E	71m	No. 30	C2d
325_AP_SS	Palić	Subotica (S)	2020-09-18	46°06'58,7"N 19°47'04,8"E	71m	No. 30	C2d
341_AP_SS	Stari Žednik	Subotica (S)	2020-09-18	45°56'55,4"N 19°37'40,9"E	89m	No. 31	C2d
342_AP_SS	Stari Žednik	Subotica (S)	2020-09-18	45°56'55,4"N 19°37'40,9"E	89m	No. 31	C2d
343_AP_SS	Stari Žednik	Subotica (S)	2020-09-18	45°56'55,4"N 19°37'40,9"E	89m	No. 31	C2d
344_AP_SS	Stari Žednik	Subotica (S)	2020-09-18	45°56'55,4"N 19°37'40,9"E	89m	No. 31	C2d
345_AP_SS	Stari Žednik	Subotica (S)	2020-09-18	45°56'55,4"N 19°37'40,9"E	89m	No. 31	C2d
351_AP_SS	Turija	Subotica (S)	2020-09-19	45°32'10,1"N 19°51'56,6"E	71m	No. 32	C1a
352_AP_SS	Turija	Subotica (S)	2020-09-19	45°32'10,1"N 19°51'56,6"E	71m	No. 32	C1a
353_AP_SS	Turija	Subotica (S)	2020-09-19	45°32'10,1"N 19°51'56,6"E	71m	No. 32	C1a
354_AP_SS	Turija	Subotica (S)	2020-09-19	45°32'10,1"N 19°51'56,6"E	71m	No. 32	C1a
355_AP_SS	Turija	Subotica (S)	2020-09-19	45°32'10,1"N 19°51'56,6"E	71m	No. 32	C1a
356_AP_SS	Turija	Subotica (S)	2020-09-19	45°32'10,1"N 19°51'56,6"E	71m	No. 32	C1a
361_AP_SS	Turija	Subotica (S)	2020-09-19	45°31'52.7"N 19°51'37.5"E	89m	No. 33	C1a
362_AP_SS	Turija	Subotica (S)	2020-09-19	45°31'52.7"N 19°51'37.5"E	89m	No. 33	C2e
363_AP_SS	Turija	Subotica (S)	2020-09-19	45°31'52.7"N 19°51'37.5"E	89m	No. 33	C2db
371_AP_SS	Starčevo	Deliblatska peščara (DS)	2020-09-21	44°48'37,3"N 20°42'11,7"E	72m	No. 34	C2e
372_AP_SS	Starčevo	Deliblatska peščara (DS)	2020-09-21	44°48'37,3"N 20°42'11,7"E	72m	No. 34	C2d
373_AP_SS	Starčevo	Deliblatska peščara (DS)	2020-09-21	44°48'37,3"N 20°42'11,7"E	72m	No. 34	C2e
374_AP_SS	Starčevo	Deliblatska peščara (DS)	2020-09-21	44°48'37,3"N 20°42'11,7"E	72m	No. 34	C2d
375_AP_SS	Starčevo	Deliblatska peščara (DS)	2020-09-21	44°48'37,3"N 20°42'11,7"E	72m	No. 34	C2d
381_AP_SS	Starčevo	Deliblatska peščara (DS)	2020-09-21	44°48'44,7"N 20°44'12,1"E	77m	No. 35	C2e
382_AP_SS	Starčevo	Deliblatska peščara (DS)	2020-09-21	44°48'44,7"N 20°44'12,1"E	77m	No. 35	C2d
383_AP_SS	Starčevo	Deliblatska peščara (DS)	2020-09-21	44°48'44,7"N 20°44'12,1"E	77m	No. 35	C2d
384_AP_SS	Starčevo	Deliblatska peščara (DS)	2020-09-21	44°48'44,7"N 20°44'12,1"E	77m	No. 35	C2d
385_AP_SS	Starčevo	Deliblatska peščara (DS)	2020-09-21	44°48'44,7"N 20°44'12,1"E	77m	No. 35	C2d
391_AP_SS	Alibunar	Deliblatska peščara (DS)	2020-09-21	45°06'00,9"N 20°58'21,2"E	76m	No. 36	C2c
392_AP_SS	Alibunar	Deliblatska peščara (DS)	2020-09-21	45°06'00,9"N 20°58'21,2"E	76m	No. 36	C2d
393_AP_SS	Alibunar	Deliblatska peščara (DS)	2020-09-21	45°06'00,9"N 20°58'21,2"E	76m	No. 36	C2c
394_AP_SS	Alibunar	Deliblatska peščara (DS)	2020-09-21	45°06'00,9"N 20°58'21,2"E	76m	No. 36	C2c
395_AP_SS	Alibunar	Deliblatska peščara (DS)	2020-09-21	45°06'00,9"N 20°58'21,2"E	76m	No. 36	C2c
401_AP_SS	Seleuš	Deliblatska peščara (DS)	2020-09-21	45°07'27,2"N 20°59'07,9"E	76m	No. 37	C2e
402_AP_SS	Seleuš	Deliblatska peščara (DS)	2020-09-21	45°07'27,2"N 20°59'07,9"E	76m	No. 37	C2d
403_AP_SS	Seleuš	Deliblatska peščara (DS)	2020-09-21	45°07'27,2"N 20°59'07,9"E	76m	No. 37	C2d
404_AP_SS	Seleuš	Deliblatska peščara (DS)	2020-09-21	45°07'27,2"N 20°59'07,9"E	76m	No. 37	C2e
405_AP_SS	Seleuš	Deliblatska peščara (DS)	2020-09-21	45°07'27,2"N 20°59'07,9"E	76m	No. 37	C2d
411_AP_SS	Velika Vrela	Deliblatska peščara (DS)	2020-09-22	44°49'50,5"N 21°06'25,9"E	84m	No. 38	C2d
412_AP_SS	Velika Vrela	Deliblatska peščara (DS)	2020-09-22	44°49'50,5"N 21°06'25,9"E	84m	No. 38	C2e
413_AP_SS	Velika Vrela	Deliblatska peščara (DS)	2020-09-22	44°49'50,5"N 21°06'25,9"E	84m	No. 38	C2e
414_AP_SS	Velika Vrela	Deliblatska peščara (DS)	2020-09-22	44°49'50,5"N 21°06'25,9"E	84m	No. 38	C2e
415_AP_SS	Velika Vrela	Deliblatska peščara (DS)	2020-09-22	44°49'50,5"N 21°06'25,9"E	84m	No. 38	C2d
421_AP_SS	Češko Selo	Deliblatska peščara (DS)	2020-09-22	44°56'47,6"N 21°22'17,6"E	125m	No. 39	C2d
422_AP_SS	Češko Selo	Deliblatska peščara (DS)	2020-09-22	44°56'47,6"N 21°22'17,6"E	125m	No. 39	C2d
423_AP_SS	Češko Selo	Deliblatska peščara (DS)	2020-09-22	44°56'47,6"N 21°22'17,6"E	125m	No. 39	C2d
424_AP_SS	Češko Selo	Deliblatska peščara (DS)	2020-09-22	44°56'47,6"N 21°22'17,6"E	125m	No. 39	C2d
425_AP_SS	Češko Selo	Deliblatska peščara (DS)	2020-09-22	44°56'47,6"N 21°22'17,6"E	125m	No. 39	C2d
431_AP_SS	Kupinik	Deliblatska peščara (DS)	2020-09-24	45°17'43,5"N 21°07'54,1"E	55m	No. 40	C2i
432_AP_SS	Kupinik	Deliblatska peščara (DS)	2020-09-24	45°17'43,5"N 21°07'54,1"E	55m	No. 40	C2d
433_AP_SS	Kupinik	Deliblatska peščara (DS)	2020-09-24	45°17'43,5"N 21°07'54,1"E	55m	No. 40	C2d
434_AP_SS	Kupinik	Deliblatska peščara (DS)	2020-09-24	45°17'43,5"N 21°07'54,1"E	55m	No. 40	C2d
435_AP_SS	Kupinik	Deliblatska peščara (DS)	2020-09-24	45°17'43,5"N 21°07'54,1"E	55m	No. 40	C2d
441_AP_SS	Kupinik	Deliblatska peščara (DS)	2020-09-24	45°17'41,7"N 21°07'49,4"E	87m	No. 41	C2d
442_AP_SS	Kupinik	Deliblatska peščara (DS)	2020-09-24	45°17'41,7"N 21°07'49,4"E	87m	No. 41	C1a
443_AP_SS	Kupinik	Deliblatska peščara (DS)	2020-09-24	45°17'41,7"N 21°07'49,4"E	87m	No. 41	C1a
444_AP_SS	Kupinik	Deliblatska peščara (DS)	2020-09-24	45°17'41,7"N 21°07'49,4"E	87m	No. 41	C2d
445_AP_SS	Kupinik	Deliblatska peščara (DS)	2020-09-24	45°17'41,7"N 21°07'49,4"E	87m	No. 41	C1a
451_AP_SS	Crepaja	Deliblatska peščara (DS)	2020-09-22	45°00'35,5"N 20°37'51,8"E	108m	No. 42	C2d
452_AP_SS	Crepaja	Deliblatska peščara (DS)	2020-09-22	45°00'35,5"N 20°37'51,8"E	108m	No. 42	C2e
453_AP_SS	Crepaja	Deliblatska peščara (DS)	2020-09-22	45°00'35,5"N 20°37'51,8"E	108m	No. 42	C2d
454_AP_SS	Crepaja	Deliblatska peščara (DS)	2020-09-22	45°00'35,5"N 20°37'51,8"E	108m	No. 42	C2e
455_AP_SS	Crepaja	Deliblatska peščara (DS)	2020-09-22	45°00'35,5"N 20°37'51,8"E	108m	No. 42	C2e
461_AP_SS	Deliblatska peščara	Deliblatska peščara (DS)	2020-09-22	44°57'59,2"N 20°58'39,8"E	69m	No. 43	C2e
462_AP_SS	Deliblatska peščara	Deliblatska peščara (DS)	2020-09-22	44°57'59,2"N 20°58'39,8"E	69m	No. 43	C2e
463_AP_SS	Deliblatska peščara	Deliblatska peščara (DS)	2020-09-22	44°57'59,2"N 20°58'39,8"E	69m	No. 43	C2e
464_AP_SS	Deliblatska peščara	Deliblatska peščara (DS)	2020-09-22	44°57'59,2"N 20°58'39,8"E	69m	No. 43	C2e
465_AP_SS	Deliblatska peščara	Deliblatska peščara (DS)	2020-09-22	44°57'59,2"N 20°58'39,8"E	69m	No. 43	C2d
472_AP_SS	Markovac	Vršac (Vr)	2020-09-24	45°08'49,2"N 21°28'39,5"E	150m	No. 44	C2d
473_AP_SS	Markovac	Vršac (Vr)	2020-09-24	45°08'49,2"N 21°28'39,5"E	150m	No. 44	C2d
474_AP_SS	Markovac	Vršac (Vr)	2020-09-24	45°08'49,2"N 21°28'39,5"E	150m	No. 44	C2d
475_AP_SS	Markovac	Vršac (Vr)	2020-09-24	45°08'49,2"N 21°28'39,5"E	150m	No. 44	C2d
476_AP_SS	Markovac	Vršac (Vr)	2020-09-24	45°08'49,2"N 21°28'39,5"E	150m	No. 44	C2i
477_AP_SS	Markovac	Vršac (Vr)	2020-09-24	45°08'49,2"N 21°28'39,5"E	150m	No. 44	C2d
481_AP_SS	Ređetka	Vršac (Vr)	2020-09-24	45°03'53,9"N 21°26'50,8"E	108m	No. 45	C2c
482_AP_SS	Ređetka	Vršac (Vr)	2020-09-24	45°03'53,9"N 21°26'50,8"E	108m	No. 45	C2c
483_AP_SS	Ređetka	Vršac (Vr)	2020-09-24	45°03'53,9"N 21°26'50,8"E	108m	No. 45	C2c
484_AP_SS	Ređetka	Vršac (Vr)	2020-09-24	45°03'53,9"N 21°26'50,8"E	108m	No. 45	C2c
485_AP_SS	Ređetka	Vršac (Vr)	2020-09-24	45°03'53,9"N 21°26'50,8"E	108m	No. 45	C2c
491_AP_SS	Mesić	Vršac (Vr)	2020-09-24	45°05'54"N 21°23'01"E	170m	No. 46	C2d
492_AP_SS	Mesić	Vršac (Vr)	2020-09-24	45°05'54"N 21°23'01"E	170m	No. 46	C2d
493_AP_SS	Mesić	Vršac (Vr)	2020-09-24	45°05'54"N 21°23'01"E	170m	No. 46	C2i
494_AP_SS	Mesić	Vršac (Vr)	2020-09-24	45°05'54"N 21°23'01"E	170m	No. 46	C2d
495_AP_SS	Mesić	Vršac (Vr)	2020-09-24	45°05'54"N 21°23'01"E	170m	No. 46	C1a

## Sheet: S2
Table S2. List of literature from which the data for the seqeunce variability of mtDNA tRNAleu-cox2 intergenic region were gathered
Population	N	Total	region	Year of sampling	Acc. No.	Reference
Croatia	20	100		2006-2008		Muñoz et al. 2009
	5			2011		Muñoz et al. 2012
	66			2007-2012	MT741501	Muñoz et al. 2021
	9			2002		Susnik et al. 2004
Italy	20	58		2006-2008		Muñoz et al. 2009
	10			2012		Coroian et al. 2014
	5			2011		Muñoz et al. 2012
	23			2007-2012		Muñoz et al. 2021
Greece	5	28		2006-2008	FJ824582 - FJ824587	Muñoz et al. 2009
	23		North Greece (18), Greece (5)	2007-2012	MT741502, MT741503, MT741505	Muñoz et al. 2021
Serbia	400	604	North Serbia (140), West Serbia (60), East Serbia (100), South Serbia (100)	2005-2007		Stevanovic et al. 2010
	37		North Serbia (13), West Serbia (10), East Serbia (6), South Serbia (8)	2011	JQ977699 - JQ977705	Muñoz et al. 2012
	8		North Serbia (1), West Serbia (2), East Serbia (2), South Serbia (3)	2007	FJ447491	Nedić et al. 2009
	30		North Serbia (10), West Serbia (10), East Serbia (10)	2006		Kozmus et al. 2007
	7		East Serbia (7)	2007-2009	JQ778290-JQ778296	Georgiev et al. 2014
	122		Serbia (97), South Serbia (25)	2007-2012	MG788257	Muñoz et al. 2021
Bosnia and Herzegovina (B&H)	50	65		2005-2007		Stevanovic et al. 2010
	5			2011		Muñoz et al. 2012
	10			2007-2012		Muñoz et al. 2021
North Macedonia	111	138	North and South North Macedonia	2005-20007		Stevanovic et al. 2010
	11			2012		Coroian et al. 2014
	5			2011		Muñoz et al. 2012
	11			2007-2012		Muñoz et al. 2021
Romania	138	316		2012	HM117904 - HM117908, HQ270149, HQ270150, JQ973664, JQ754648 - JQ754650	Coroian et al. 2014
	17			2009	HQ215207, HQ215208	Mărghitaş et al. 2010
	3			2017-2018		Oleksa et al. 2021
	158		Romania, Southeast of Romania	2007-2012	MG788257, MT741498 - MT741500	Muñoz et al. 2021
Slovenia	10	104		2012		Coroian et al. 2014
	65		ten districts	2002		Susnik et al. 2004
	29			2007-2012	MT741507	Muñoz et al. 2021
Ukraine	5	5		2018	MK140896 - MK140906	Cherevatov et al. 2019
Austria	6	58		2018	MK140896 - MK140907	Cherevatov et al. 2019
	52			2007-2012		Muñoz et al. 2021
Albania	4	8		2011		Muñoz et al. 2012
	4			2007-2012		Muñoz et al. 2021
Hungary	50	196		2007-2012	MT741504, MT741506	Muñoz et al. 2021
	146		East and West Hungary	2017-2018	MW939577 - MW939620	Oleksa et al. 2021
Montenegro	8	8		2007-2012		Muñoz et al. 2021
Bulgaria	8	8		2007-2012	MT741504	Muñoz et al. 2021
1. Muñoz, I., De la Rúa, P. Wide genetic diversity in Old World honey bees threaten by introgression. Apidologie 52 (2021), 200–217 . https://doi.org/10.1007/s13592-020-00810-0
2. Muñoz I., Dall’Olio, R., Lodesani, M. and De la Rúa P. Population genetic structure of coastal Croatian honeybees (Apis mellifera carnica). Apidologie, 40 6 (2009), 617-626. https://doi.org/10.1051/apido/2009041
3. Stevanovic, J., Stanimirovic, Z., Radakovic, M. & Kovacevic., S. R. Biogeographic study of the honey bee (Apis mellifera L.) from Serbia, Bosnia and Herzegovina and Republic of Macedonia Based on mitochondrial DNA analyses. Russ J Genet 46 (2010), 603–609. https://doi.org/10.1134/S1022795410050145
4. Coroian, C. O., Muñoz, I., Schlüns, E. A., Paniti‐Teleky, O. R., Erler, S., Furdui, E. M., Mărghitaş1 L. A., Dezmirean1 D. S., Schlüns1 H., De la Rúa P., & Moritz, R. F. Climate rather than geography separates two European honeybee subspecies. Molecular ecology, 23(9),(2014), 2353-2361.
5. Mărghitaş, L. A., Coroian, C., Dezmirean, D., Stan, L., & Furdui, E. Genetic Diversity of Honeybees from Moldova (Romania) Based on mtDNA Analysis. Bulletin of the University of Agricultural Sciences & Veterinary Medicine Cluj-Napoca. Animal Science & Biotechnologies, 2010, 67.
6. Nedić, N., Stanisavljević, L., Mladenović, M., & Stanisavljević, J. Molecular characterization of the honeybee Apis mellifera carnica in Serbia. Archives of Biological Sciences, 2009, 61.4: 587-598.
7. Cherevatov, O. V., Panchuk, I. I., Kerek, S. S., & Volkov, R. A. Molecular diversity of the CoI–CoII spacer region in the mitochondrial genome and the origin of the carpathian bee. Cytology and Genetics, 2019, 53.4: 276-281.
8. Muñoz I., Stevanović, J., Stanimirović, Z., & De la Rua, P. Genetic variation of Apis mellifera from Serbia inferred from mitochondrial analysis. Journal of Apicultural Science, 2012, 56.1: 59-69.
9. Sušnik, S., Kozmus, P., Poklukar, J., & Meglic, V. Molecular characterisation of indigenous Apis mellifera carnica in Slovenia. Apidologie, 2004, 35.6: 623-636.
10. Kozmus, P., Stevanovic, J., Stanimirovic, Z., Stojic, V., Kulisic, Z., & Meglic, V. Analysis of mitochondrial DNA in honey bees (Apis mellifera) from Serbia. Acta Veterinaria (Beograd), 2007, 57.5-6: 465-476.
11. Oleksa, A., Kusza, S., Tofilski, A., Mitochondrial DNA Suggests the Introduction of Honeybees of African Ancestry to East-Central Europe. Insects, 2021, 12: 410
12. Georgijev, A. Morphological, productive and genetic DNK analyses of selected lineages of honeybee (Apis mellifera carnica Poll.) in eastern Serbia. Doctoral dissertation, Faculty of Agriculture, University of Belgrade, Serbia 2014, https://fedorabg.bg.ac.rs/fedora/get/o:11018/bdef:Content/get

## Sheet: S3
Table S3. Haplogroup frequencies found in A. mellifera from the 8 different localities originating from South and North parts of Serbia
		Haplogroup frequencies
	Locality	C2d	C2e	C2c	C1a	C2i	C2j	C2ac	C2ce	C2db
South	Leskovac	0.423	0.423	0.058	0.096	0	0	0	0	0
	Tromeđa	0.857	0.143	0	0	0	0	0	0	0
	Vlasina	0.533	0.333	0	0.133	0	0	0	0	0
	Stara Planina	0.704	0.074	0	0.111	0.037	0.037	0.037	0	0
North	Fruška Gora	0.833	0.1	0.033	0	0	0	0	0.033	0
	Vršac	0.467	0	0.333	0.067	0.133	0	0	0	0
	Deliblatska Peščara	0.54	0.3	0.08	0.06	0.02	0	0	0	0
	Subotica	0.5	0.079	0.053	0.263	0.053	0	0	0	0.053

## Sheet: S4
Table S4a. Standard parameters of genetic diversity based on the variability mtDNA tRNAleu-cox2 intergenic region sequence found in from the 8 different localities originating from South and North parts of Serbia
		Parameters of genetic diversity
	Population	N	Nh	NP	H	π	RMP	MPD
North	Fruška Gora	30	4	4	0.3034 +/-0.1041	0.000957 +/-0.000927	0.7067	0.510345 +/-0.443818
	Vršac	15	4	4	0.6952 +/-0.0815	0.002640 +/-0.001917	0.3511	1.409524 +/-0.912968
	Deliblatska Peščara	50	5	5	0.6204 +/-0.0516	0.002013 +/-0.001499	0.392	1.075102 +/-0.721242
	Subotica	38	6	6	0.6842 +/-0.0606	0.003071 +/-0.002058	0.3338	1.640114 +/-0.988968
South	Leskovac	52	4	4	0.6418 +/-0.0364	0.002258 +/-0.001626	0.3706	1.205882 +/-0.782522
	Tromeđa	15	3	2	0.3619 +/-0.1448	0.000715 +/-0.000801	0.6622	0.380952 +/-0.380952
	Vlasina	15	3	4	0.6286 +/-0.0856	0.002283 +/-0.001723	0.4133	1.219048 +/-0.820597
	Stara Planina	26	5	6	0.4615 +/-0.1141	0.001976 +/-0.001508	0.5562	1.055385 +/-0.722823
N - number of samples, Nh- number of haplotypes, NP - number of polymorphic sites, H - haplotype diversity, RMP - random match probability, MPD - mean number of pairwise differences, π - nucleotide diversity
Table S4b. Standard parameters of genetic diversity based on the variability mtDNA tRNAleu-cox2 intergenic region sequence found in 14 different European A. mellifera populations including the two regions of Serbia
		Parameters of genetic diversity
	Population	N	Nh	NP	H	π	RMP	MPD
	Albania	8	2	1	0.5714 +/- 0.0945	0.001072 +/- 0.001097	0.5	0.571429 +/- 0.513440
	Austria	58	4	5	0.4483 +/- 0.0619	0.001018 +/- 0.000947	0.5595	0.543860 +/- 0.455943
	BIH	65	2	1	0.0606 +/- 0.0402	0.000114 +/- 0.000276	0.9404	0.060577 +/- 0.132753
	Bulgaria	8	4	8	0.6429 +/- 0.1841	0.003731 +/- 0.002670	0.4375	2.000000 +/- 1.256177
	Croatia	100	5	5	0.7477 +/- 0.0204	0.003602 +/- 0.002288	0.2598	1.923232 +/- 1.103123
	Greece	28	5	5	0.4339 +/- 0.1112	0.001032 +/- 0.000974	0.5816	0.550265 +/- 0.466318
	Hungary	196	11	14	0.7665 +/- 0.0168	0.003204 +/- 0.002077	0.2374	1.720304 +/- 1.007829
	Italy	58	2	1	0.0998 +/- 0.0522	0.000187 +/- 0.000359	0.9019	0.099819 +/- 0.172800
	North Macedonia	138	1	0	0.0000 +/- 0.0000	0.000000 +/- 0.000000	1	0.000000 +/- 0.000000
	Montenegro	8	2	1	0.4286 +/- 0.1687	0.000804 +/- 0.000916	0.625	0.428571 +/- 0.428571
	Romania	316	19	16	0.6943 +/- 0.0188	0.002661 +/- 0.001803	0.3079	1.423508 +/- 0.872121
	Slovenia	104	6	6	0.4111 +/- 0.0583	0.001581 +/- 0.001253	0.5928	0.845594 +/- 0.605267
	Ukraine	5	1	0	0.0000 +/- 0.0000	0.000000 +/- 0.000000	1	0.000000 +/- 0.000000
	North Serbia	134	7	7	0.6118 +/- 0.0412	0.002285 +/- 0.001620	0.3927	1.220177 +/- 0.781603
	South Serbia	107	7	7	0.5974 +/- 0.0365	0.002063 +/- 0.001509	0.4082	1.101746 +/- 0.727479
	Serbia*	604	10	10	0.3266 +/- 0.0225	0.000764 +/- 0.000780	0.674	0.408136 +/- 0.376803
	Serbia 2005-2007	400	1	0	0.0000 +/- 0.0000	0.000000 +/- 0.000000	1	0.000000 +/- 0.000000
	Serbia 2012	37	7	7	0.6276 +/- 0.0721	0.001833 +/- 0.001414	0.3893	0.978979 +/- 0.679195
	Serbia 2007	38	3	3	0.1038 +/- 0.0668	0.000390 +/- 0.000541	0.8989	0.207681 +/- 0.259417
	Serbia 2007-2012	122	8	8	0.6154 +/- 0.0301	0.001728 +/- 0.001331	0.3897	0.922639 +/- 0.641794
	Serbia 2007-2009	7	3	3	0.6667 +/- 0.1598	0.001966 +/- 0.001687	0.4286	1.047619 +/- 0.784818
N - number of samples, Nh- number of haplotypes, NP - number of polymorphic sites, H - haplotype diversity, RMP - random match probability, MPD - mean number of pairwise differences, π - nucleotide diversity
*- population set represented by the literature and GenBank data for Serbia
Serbia (2005-2007) - Stevanovic et al. 2010.
Serbia (2011) - Munoz et al. 2012.
Serbia (2006-2007) - (2006) Kozmus et al., 2007. + (2007) Nedic et al. 2009.
Serbia (2007-2012) - Munoz et al. 2021.
Serbia (2007-2009) - Georgijev 2014.

## Sheet: S5
Table S5. Pairwise population Fst (below diagonal) and Fst p-values (above diagonal) between the populations based on the sequence variability of mtDNA tRNAleu-cox2 intergenic region found in 14 different A. mellifera populations and 8 localities in Serbia. Statsticaly significant p -values (≤ 0.05) are
highlited in green and statsticaly significant Fst values are marked in bold and italic
a) Pairwise population Fst between the 8 localities from the North and South part of Serbia
			North				South
			Leskovac	Vlasina	Tromeđa	Stara Planina	Fruška Gora	Subotica	Deliblatska peščara	Vršac
	South	Leskovac	-	0.85156	0.0332	0.02539	0.00684	0.00195	0.45801	0.00293
		Vlasina	-0.03567	-	0.24023	0.2998	0.08203	0.10352	0.93066	0.03223
		Tromeđa	0.0893	0.05263	-	0.21191	0.54688	0.02148	0.15527	0.00879
		Stara Planina	0.06915	0.00714	0.03683	-	0.2207	0.1709	0.17578	0.10645
	North	Fruška Gora	0.1032	0.06255	-0.0167	0.01256	-	0.00586	0.0625	0.00098
		Subotica	0.11062	0.05152	0.14212	0.02097	0.13066	-	0.01074	0.36523
		Deliblatska peščara	-0.00454	-0.03845	0.03445	0.02169	0.03978	0.08677	-	0.00781
		Vršac	0.17503	0.12511	0.24275	0.06268	0.21786	-0.00318	0.14075	-
b) Pairwise population Fst between the 14 European populations including two Serbian regions (North and South)
			Serbia	South Serbia	North Serbia	Romania	Austria	Hungary	Croatia	Slovenia	Bulgaria	B&H	Albania	North Macedonia	Montenegro	Greece	Ukraine	Italy
		Serbia*	-	0	0	0	0	0	0	0	0.01129	0.00663	0.0005	0	0.7326	0.00535	0	0
		South Serbia	0.08574	-	0.04901	0	0	0	0	0	0.07633	0.0001	0.00851	0	0.67766	0.00099	0.0001	0
		North Serbia	0.11773	0.01619	-	0	0	0	0	0	0.13751	0	0.01	0	0.29987	0.00386	0.0003	0
		Romania	0.26959	0.12829	0.05864	-	0	0.0003	0	0	0.06346	0	0.00426	0	0.01346	0	0.00842	0
		Austria	0.82099	0.62898	0.55117	0.373	-	0	0	0.00337	0	0	0	0	0	0	0.41224	0
		Hungary	0.41151	0.17602	0.11561	0.03718	0.23651	-	0.00416	0	0.01297	0	0.0002	0	0.00644	0	0.05524	0
		Croatia	0.47903	0.16556	0.13639	0.11148	0.28158	0.03371	-	0	0.01307	0	0.00069	0	0.01208	0	0.04178	0
		Slovenia	0.75379	0.53448	0.45492	0.27331	0.05164	0.1445	0.20154	-	0	0	0	0	0	0	0.53133	0
		Bulgaria	0.2086	0.08439	0.04491	0.08141	0.69018	0.15133	0.18847	0.55461	-	0.00228	0.07465	0	0.46213	0.04485	0.00396	0
		B&H	0.03359	0.12513	0.10601	0.18993	0.87329	0.2948	0.36021	0.7341	0.30071	-	0	0.10286	0.05613	0.0002	0	0
		Albania	0.36649	0.21688	0.17524	0.23758	0.80109	0.29654	0.31265	0.67225	0.14286	0.68669	-	0	0.04099	0.0295	0.00079	0
		North Macedonia	0.06538	0.20402	0.15934	0.22337	0.92565	0.35719	0.46494	0.80633	0.54947	0.03639	0.89933	-	0.00208	0	0	0
		Montenegro	-0.03972	-0.02553	0.02016	0.15564	0.79074	0.2154	0.20217	0.64493	0.02857	0.29875	0.33333	0.7458	-	0.09098	0.00059	0
		Greece	0.07765	0.11049	0.08802	0.17167	0.78535	0.26051	0.29789	0.65884	0.07894	0.07251	0.17629	0.16929	0.07193	-	0	0
		Ukraine	0.82447	0.58436	0.50104	0.31332	0.01002	0.16097	0.20405	-0.04211	0.52703	0.97221	0.85765	1	0.88095	0.80384	-	0
		Italy	0.88114	0.75503	0.69373	0.56522	0.60659	0.46511	0.47403	0.56173	0.89052	0.97345	0.95398	0.98998	0.95603	0.92254	0.90505	-
c) Pairwise population Fst between the 14 European populations including two Serbian regions (North and South) and data for Serbia from different time periods
			Romania	Austria	Hungary	Croatia	Slovenia	Bulgaria	B&H	Albania	North Macedonia	Montenegro	Greece	Ukraine	Italy	Serbia North 2005-2012	Serbia South 2005-2012	South Serbia 2020	North Serbia 2020
		Romania	-	0	0.0001	0	0	0.06425	0	0.00475	0	0.01218	0	0.0104	0	0	0	0	0
		Austria	0.373	-	0	0	0.00376	0	0	0	0	0	0	0.41719	0	0	0	0	0
		Hungary	0.03718	0.23651	-	0.00455	0	0.01287	0	0.0002	0	0.00386	0	0.05316	0	0	0	0	0
		Croatia	0.11148	0.28158	0.03371	-	0	0.01307	0	0.0004	0	0.01287	0	0.04505	0	0	0	0	0
		Slovenia	0.27331	0.05164	0.1445	0.20154	-	0	0	0	0	0	0	0.53935	0	0	0	0	0
		Bulgaria	0.08141	0.69018	0.15133	0.18847	0.55461	-	0.00158	0.07732	0.0001	0.47065	0.04811	0.00545	0	0.00406	0.01158	0.07732	0.13365
		B&H	0.18993	0.87329	0.2948	0.36021	0.7341	0.30071	-	0.0001	0.10068	0.05178	0.0005	0	0	0.16889	0.0005	0	0
		Albania	0.23758	0.80109	0.29654	0.31265	0.67225	0.14286	0.68669	-	0	0.03703	0.03148	0.00069	0	0.0004	0.00129	0.00713	0.01129
		North Macedonia	0.22337	0.92565	0.35719	0.46494	0.80633	0.54947	0.03639	0.89933	-	0.00317	0	0	0	0.0003	0	0	0
		Montenegro	0.15564	0.79074	0.2154	0.20217	0.64493	0.02857	0.29875	0.33333	0.7458	-	0.09088	0.00059	0	0.20028	0.9999	0.67399	0.31037
		Greece	0.17167	0.78535	0.26051	0.29789	0.65884	0.07894	0.07251	0.17629	0.16929	0.07193	-	0	0	0.00653	0.00059	0.00129	0.00436
		Ukraine	0.31332	0.01002	0.16097	0.20405	-0.04211	0.52703	0.97221	0.85765	1	0.88095	0.80384	-	0	0	0	0.0001	0.00059
		Italy	0.56522	0.60659	0.46511	0.47403	0.56173	0.89052	0.97345	0.95398	0.98998	0.95603	0.92254	0.90505	-	0	0	0	0
		Serbia North 2005-2012	0.22565	0.87573	0.34849	0.43145	0.77203	0.30361	0.01338	0.53533	0.06925	0.05628	0.08478	0.91406	0.9454	-	0.00119	0	0
		Serbia South 2005-2012	0.23258	0.82706	0.32698	0.3682	0.72808	0.24397	0.10963	0.40358	0.20168	-0.06804	0.12817	0.84558	0.9077	0.05411	-	0	0
		South Serbia 2020	0.12829	0.62898	0.17602	0.16556	0.53448	0.08439	0.12513	0.21688	0.20402	-0.02553	0.11049	0.58436	0.75503	0.12451	0.05788	-	0.04049
		North Serbia 2020	0.05864	0.55117	0.11561	0.13639	0.45492	0.04491	0.10601	0.17524	0.15934	0.02016	0.08802	0.50104	0.69373	0.12481	0.10558	0.01619	-
d) Pairwise population Fst between the 14 European populations including two Serbian regions (North and South) and data for Serbia from different time periods
			South Serbia	North Serbia	Romania	Austria	Hungary	Croatia	Slovenia	Bulgaria	B&H	Albania	North Macedonia	Montenegro	Greece	Ukraine	Italy	Serbia 2005-2007	Serbia 2011	Serbia 2006-2007	Serbia 2007-2012	Serbia 2007-2009
		South Serbia	-	0.04316	0	0	0	0	0	0.07544	0	0.00861	0	0.68082	0.00109	0.0003	0	0	0.30027	0	0.10771	0.08514
		North Serbia	0.01619	-	0	0	0	0	0	0.13672	0.0002	0.0099	0	0.30522	0.00406	0.0004	0	0	0.01297	0	0	0.21384
		Romania	0.12829	0.05864	-	0	0.0001	0	0	0.06465	0	0.00386	0	0.01356	0	0.00861	0	0	0	0	0	0.14454
		Austria	0.62898	0.55117	0.373	-	0	0	0.00485	0	0	0	0	0	0	0.42144	0	0	0	0	0	0
		Hungary	0.17602	0.11561	0.03718	0.23651	-	0.00584	0	0.01376	0	0.0001	0	0.00594	0	0.05079	0	0	0	0	0	0.03277
		Croatia	0.16556	0.13639	0.11148	0.28158	0.03371	-	0	0.01139	0	0.0005	0	0.01356	0	0.04039	0	0	0	0	0	0.02237
		Slovenia	0.53448	0.45492	0.27331	0.05164	0.1445	0.20154	-	0	0	0	0	0	0	0.52985	0	0	0	0	0	0
		Bulgaria	0.08439	0.04491	0.08141	0.69018	0.15133	0.18847	0.55461	-	0.00208	0.07742	0.0002	0.46867	0.04594	0.00436	0	0	0.04396	0	0.01465	0.65221
		B&H	0.12513	0.10601	0.18993	0.87329	0.2948	0.36021	0.7341	0.30071	-	0.0002	0.0986	0.06188	0.0004	0	0	0.02138	0	0	0	0.00158
		Albania	0.21688	0.17524	0.23758	0.80109	0.29654	0.31265	0.67225	0.14286	0.68669	-	0	0.03663	0.02841	0.0005	0	0	0.00446	0	0.00089	0.02564
		North Macedonia	0.20402	0.15934	0.22337	0.92565	0.35719	0.46494	0.80633	0.54947	0.03639	0.89933	-	0.00287	0	0	0	0.9999	0	0	0	0
		Montenegro	-0.02553	0.02016	0.15564	0.79074	0.2154	0.20217	0.64493	0.02857	0.29875	0.33333	0.7458	-	0.08534	0.00089	0	0.0005	0.9999	0.0002	0.75111	0.09138
		Greece	0.11049	0.08802	0.17167	0.78535	0.26051	0.29789	0.65884	0.07894	0.07251	0.17629	0.16929	0.07193	-	0	0	0	0.0003	0	0.0001	0.02564
		Ukraine	0.58436	0.50104	0.31332	0.01002	0.16097	0.20405	-0.04211	0.52703	0.97221	0.85765	1	0.88095	0.80384	-	0	0	0	0	0	0.01317
		Italy	0.75503	0.69373	0.56522	0.60659	0.46511	0.47403	0.56173	0.89052	0.97345	0.95398	0.98998	0.95603	0.92254	0.90505	-	0	0	0	0	0
		Serbia 2005-2007	0.35233	0.27692	0.31494	0.96698	0.50036	0.64857	0.89712	0.78076	0.0943	0.96199	0	0.89356	0.36145	1	0.99571	-	0	0	0	0
		Serbia 2011	0.0035	0.05008	0.177	0.72279	0.22373	0.20584	0.61035	0.10142	0.18876	0.21158	0.36051	-0.05822	0.11389	0.67163	0.86161	0.59114	-	0	0.84417	0.03782
		Serbia 2006-2007	0.34606	0.41231	0.47021	0.87377	0.45025	0.37647	0.77048	0.6654	0.87997	0.80589	0.95313	0.65903	0.71913	0.93885	0.96386	0.98076	0.39516	-	0	0
		Serbia 2007-2012	0.00966	0.06605	0.19473	0.69379	0.24478	0.23008	0.6024	0.14893	0.16109	0.25305	0.25187	-0.03772	0.14387	0.66349	0.80367	0.40785	-0.01236	0.30682	-	0.02921
		Serbia 2007-2009	0.07666	0.02767	0.04993	0.71773	0.13636	0.17446	0.55687	-0.02158	0.43529	0.25195	0.73051	0.11111	0.11792	0.69661	0.92759	0.88658	0.11295	0.75364	0.14634	-
e) Pairwise population Fst between the 14 European populations including two Serbian regions (North and South) and data for Serbia from different time periods and regions of South and North Serbia
			Romania	Austria	Hungary	Croatia	Slovenia	Bulgaria	B&H	Albania	North Macedonia	Montenegro	Greece	Ukraine	Italy	Serbia North 2005-2007	Serbia South 2005-2007	Serbia North 2007-2012	Serbia South 2007-2012	South Serbia 2020	North Serbia 2020
		Romania	-	0	0.0001	0	0	0.06791	0	0.00485	0	0.01277	0	0.00743	0	0	0	0.00069	0	0	0
		Austria	0.373	-	0	0	0.00356	0	0	0	0	0	0	0.42392	0	0	0	0	0	0	0
		Hungary	0.03718	0.23651	-	0.00455	0	0.01267	0	0.0003	0	0.00525	0	0.05584	0	0	0	0.0001	0	0	0
		Croatia	0.11148	0.28158	0.03371	-	0	0.01238	0	0.00069	0	0.01139	0	0.03732	0	0	0	0.00188	0	0	0
		Slovenia	0.27331	0.05164	0.1445	0.20154	-	0	0	0	0	0	0	0.54915	0	0	0	0	0	0	0
		Bulgaria	0.08141	0.69018	0.15133	0.18847	0.55461	-	0.00129	0.07445	0.0001	0.46174	0.04415	0.00406	0	0.00198	0.00396	0.02831	0	0.07801	0.13325
		B&H	0.18993	0.87329	0.2948	0.36021	0.7341	0.30071	-	0	0.10256	0.05732	0.0003	0	0	0.35719	0.07257	0.00119	0	0	0
		Albania	0.23758	0.80109	0.29654	0.31265	0.67225	0.14286	0.68669	-	0	0.0394	0.03069	0.00069	0	0	0	0.02515	0	0.00762	0.00901
		North Macedonia	0.22337	0.92565	0.35719	0.46494	0.80633	0.54947	0.03639	0.89933	-	0.00248	0	0	0	0.00099	0	0	0	0	0
		Montenegro	0.15564	0.79074	0.2154	0.20217	0.64493	0.02857	0.29875	0.33333	0.7458	-	0.08811	0.00069	0	0.13147	0.2868	0.9999	0.11048	0.68379	0.30136
		Greece	0.17167	0.78535	0.26051	0.29789	0.65884	0.07894	0.07251	0.17629	0.16929	0.07193	-	0	0	0.00248	0.0102	0.01198	0	0.00139	0.00297
		Ukraine	0.31332	0.01002	0.16097	0.20405	-0.04211	0.52703	0.97221	0.85765	1	0.88095	0.80384	-	0	0	0	0	0	0	0.0003
		Italy	0.56522	0.60659	0.46511	0.47403	0.56173	0.89052	0.97345	0.95398	0.98998	0.95603	0.92254	0.90505	-	0	0	0	0	0	0
		Serbia North 2005-2007	0.22308	0.88913	0.34742	0.43522	0.77996	0.34596	0.00458	0.61197	0.06344	0.12646	0.09742	0.93764	0.95839	-	0.29502	0.00198	0	0	0
		Serbia South 2005-2007	0.20919	0.8574	0.31756	0.38302	0.74304	0.25842	0.0228	0.4814	0.09425	0.02241	0.06998	0.90157	0.94083	0.0001	-	0.01742	0	0	0
		Serbia North 2007-2012	0.19229	0.77939	0.24109	0.22047	0.6479	0.08121	0.31838	0.23109	0.62647	-0.0839	0.10912	0.77841	0.93267	0.24499	0.12214	-	0.02168	0.30947	0.06118
		Serbia South 2007-2012	0.33096	0.8196	0.33817	0.27995	0.70568	0.3859	0.64485	0.5551	0.81693	0.19417	0.44443	0.84741	0.93335	0.61565	0.49674	0.13913	-	0.0003	0
		South Serbia 2020	0.12829	0.62898	0.17602	0.16556	0.53448	0.08439	0.12513	0.21688	0.20402	-0.02553	0.11049	0.58436	0.75503	0.13828	0.09902	0.00733	0.13113	-	0.04683
		North Serbia 2020	0.05864	0.55117	0.11561	0.13639	0.45492	0.04491	0.10601	0.17524	0.15934	0.02016	0.08802	0.50104	0.69373	0.12978	0.10472	0.05795	0.22001	0.01619	-

## Sheet: S6
Table S6. Haplogroup frequencies detected in 14 analysed Euroepan A. mellifera populations including the regions of South and North Serbia
	Haplogroup
Population	C1a	C2c	C2d	C2e	C2f	C2i	C2j	C2l	C2o	C2p	C2q	C2r	C2s	C2t	C2u	C2v	C2w	C2x	C2y	C2z	C2aa	C2ab	C2ac	C2ad	C2ae	C2af	C2ag	C2ah	C2ca	C3a	C2ce	C2db
Romania	0.0443038	0.316456	0.449367	0.00632911	0.00316456	0.00632911	0.028481	0	0	0.00316456	0.028481	0.00632911	0	0.00316456	0.0348101	0.00632911	0.0126582	0.00632911	0.00632911	0.00632911	0.0221519	0.00949367	0	0	0	0	0	0	0	0	0	0
Austria	0.241379	0.706897	0	0.017241	0	0	0	0.034483	0	0	0	0	0	0	0	0	0	0	0	0	0	0	0	0	0	0	0	0	0	0	0	0
Hungary	0.107143	0.326531	0.316327	0.122449	0	0	0	0.0102041	0	0	0	0	0.0102041	0	0	0	0	0	0	0	0.0102041	0	0.0561224	0	0	0.0102041	0	0.0255102	0.00510204	0	0	0
Croatia	0.22	0.24	0.12	0.37	0	0	0	0	0	0	0	0	0	0	0	0	0	0	0	0	0	0	0.05	0	0	0	0	0	0	0	0	0
Slovenia	0.086538	0.759615	0.057692	0.067308	0	0.009615	0	0	0	0	0	0	0	0	0	0	0	0	0	0	0	0	0	0	0	0	0	0	0	0.019231	0	0
Bulgaria	0	0	0.625	0	0	0	0.125	0.125	0	0	0	0	0	0	0	0	0	0	0	0	0	0	0	0	0	0.125	0	0	0	0	0	0
B&H	0	0	0.969231	0.030769	0	0	0	0	0	0	0	0	0	0	0	0	0	0	0	0	0	0	0	0	0	0	0	0	0	0	0	0
Albania	0	0	0.5	0	0	0.5	0	0	0	0	0	0	0	0	0	0	0	0	0	0	0	0	0	0	0	0	0	0	0	0	0	0
North Macedonia	0	0	1	0	0	0	0	0	0	0	0	0	0	0	0	0	0	0	0	0	0	0	0	0	0	0	0	0	0	0	0	0
Montenegro	0	0	0.75	0.25	0	0	0	0	0	0	0	0	0	0	0	0	0	0	0	0	0	0	0	0	0	0	0	0	0	0	0	0
Greece	0	0	0.75	0	0	0.107143	0	0	0	0	0	0	0	0	0	0	0	0	0	0	0	0	0	0.035714	0.035714	0	0.071429	0	0	0	0	0
Ukraine	0	1	0	0	0	0	0	0	0	0	0	0	0	0	0	0	0	0	0	0	0	0	0	0	0	0	0	0	0	0	0	0
Italy	0.948276	0.051724	0	0	0	0	0	0	0	0	0	0	0	0	0	0	0	0	0	0	0	0	0	0	0	0	0	0	0	0	0	0
Serbia*	0.00663378	0.0132676	0.807966	0.144014	0	0.0115508	0.00165555	0	0.00326143	0.00668344	0	0	0	0	0.00331109	0	0	0	0	0	0.00165555	0	0	0	0	0	0	0	0	0	0	0
South Serbia (2020)	0.0934579	0.0280374	0.560748	0.28972	0	0.00934579	0.00934579	0	0	0	0	0	0	0	0	0	0	0	0	0	0	0	0.00934579	0	0	0	0	0	0	0	0	0
North Serbia (2020)	0.104478	0.0895522	0.589552	0.156716	0	0.0373134	0	0	0	0	0	0	0	0	0	0	0	0	0	0	0	0	0	0	0	0	0	0	0	0	0.00746269	0.0149254
Serbia (2005-2007)	0	0	1	0	0	0	0	0	0	0	0	0	0	0	0	0	0	0	0	0	0	0	0	0	0	0	0	0	0	0	0	0
Serbia (2012)	0.027027	0.027027	0.567568	0.243243	0	0.0540541	0	0	0.027027	0.0540541	0	0	0	0	0	0	0	0	0	0	0	0	0	0	0	0	0	0	0	0	0	0
Serbia (2006-2007)	0	0	0	0.95	0	0.03	0.03	0	0	0	0	0	0	0	0	0	0	0	0	0	0	0	0	0	0	0	0	0	0	0	0	0
Serbia (2007-2012)	0.0246475	0.0492951	0.516689	0.344172	0	0.0325984	0	0	0.00795082	0.0166967	0	0	0	0	0	0	0	0	0	0	0.00795082	0	0	0	0	0	0	0	0	0	0	0
Serbia (2007-2009)	0	0.142857	0.571429	0	0	0	0	0	0	0	0	0	0	0	0.285714	0	0	0	0	0	0	0	0	0	0	0	0	0	0	0	0	0
*-data for the Serbia from the literature and GenBank
Serbia (2005-2007) - Stevanovic et al. 2010.
Serbia (2011) - Munoz et al. 2012.
Serbia (2006-2007) - (2006) Kozmus et al., 2007. + (2007) Nedic et al. 2009.
Serbia (2007-2012) - Munoz et al. 2021.
Serbia (2007-2009) - Georgijev 2014.

## Sheet: S7
Table S7. Haplotype distribution in the South and North regions of Serbia according to the literature compared to the sample collected for the current study
	North Serbia 2005-2007								North Serbia 2007-2012							North Serbia 2005-2012					North Serbia 2020
	Haplotype	Stevanovic 2010.	Nedic 2009.	Kozmus 2007.	Total	Ratio	Percentage		Haplotype	Munoz 2012.	Munoz 2021.	Total	Ratio	Percentage		Haplotype	Total	Ratio	Percentage		Haplotype	Current study	Total	Ratio	Percentage
	C1a	0	0	0	0	0	0		C1a	0	0	0	0	0		C1a	0	0	0		C1a	14	14	0.104478	10.4478
	C2c	0	0	0	0	0	0		C2c	0	0	0	0	0		C2c	0	0	0		C2c	12	12	0.0895522	8.95522
	C2d	140	0	0	140	0.927152	92.7152		C2d	8	0	8	0.615385	61.5385		C2d	148	0.902439	90.2439		C2d	79	79	0.589552	58.9552
	C2e	0	1	10	11	0.0728477	7.28477		C2e	3	0	3	0.230769	23.0769		C2e	14	0.0853659	8.53659		C2e	21	21	0.156716	15.6716
	C2i	0	0	0	0	0	0		C2i	1	0	1	0.0769231	7.69231		C2i	1	0.00609756	0.609756		C2i	5	5	0.0373134	3.73134
	C2o	0	0	0	0	0	0		C2o	1	0	1	0.0769231	7.69231		C2o	1	0.00609756	0.609756		C2db	2	2	0.0149254	1.49254
					151	1	100					13	1	100			164	1	100		C2ce	1	1	0.00746269	0.746269
																							134	1	100
	South Serbia 2005-2007								South Serbia 2007-2012							South Serbia 2005-2012					South Serbia 2020
	Haplotype	Stevanovic 2010.	Nedic 2009.	Kozmus 2007.	Total	Ratio	Percentage		Haplotype	Munoz 2012.	Munoz 2021.	Total	Ratio	Percentage		Haplotype	Total	Ratio	Percentage		Haplotype	Current study	Total	Ratio	Percentage
	C1a	0	0	0	0	0	0		C1a	0	0	0	0	0		C1a	0	0	0		C1a	10	10	0.0934579	9.34579
	C2c	0	0	0	0	0	0		C2c	0	0	0	0	0		C2c	0	0	0		C2c	3	3	0.0280374	2.80374
	C2d	100	0	0	100	0.884956	88.4956		C2d	6	6	12	0.363636	36.3636		C2d	112	0.767123	76.7123		C2d	60	60	0.560748	56.0748
	C2e	0	2	10	12	0.106195	10.6195		C2e	2	19	21	0.636364	63.6364		C2e	33	0.226027	22.6027		C2e	31	31	0.28972	28.972
	C2i	0	1	0	1	0.00884956	0.884956		C2i	0	0	0	0	0		C2i	1	0.00684932	0.684932		C2i	1	1	0.00934579	0.934579
	C2o	0	0	0	0	0	0		C2o	0	0	0	0	0		C2o	0	0	0		C2j	1	1	0.00934579	0.934579
					113	1	100					33	1	100			146	1	100		C2ac	1	1	0.00934579	0.934579
																							107	1	100
1. Muñoz, I., De la Rúa, P. Wide genetic diversity in Old World honey bees threaten by introgression. Apidologie 52 (2021), 200–217 . https://doi.org/10.1007/s13592-020-00810-0
2. Stevanovic, J., Stanimirovic, Z., Radakovic, M. & Kovacevic., S. R. Biogeographic study of the honey bee (Apis mellifera L.) from Serbia, Bosnia and Herzegovina and Republic of Macedonia Based on mitochondrial DNA analyses. Russ J Genet 46 (2010), 603–609. https://doi.org/10.1134/S1022795410050145
3. Nedić, N., Stanisavljević, L., Mladenović, M., & Stanisavljević, J. Molecular characterization of the honeybee Apis mellifera carnica in Serbia. Archives of Biological Sciences, 2009, 61.4: 587-598.
4. Munoz, I., Stevanović, J., Stanimirović, Z., & De la Rua, P. Genetic variation of Apis mellifera from Serbia inferred from mitochondrial analysis. Journal of Apicultural Science, 2012, 56.1: 59-69.
5. Kozmus, P., Stevanovic, J., Stanimirovic, Z., Stojic, V., Kulisic, Z., & Meglic, V. Analysis of mitochondrial DNA in honey bees (Apis mellifera) from Serbia. Acta Veterinaria (Beograd), 2007, 57.5-6: 465-476.

## Sheet: S8
Table S8. Outcomes of AMOVA analysis based on the variability of the tRNAleu-cox2 intergenic region analyzed for Serbia (litearture and GenBank data) and a sample from Serbia presented in this paper.
a) two groups - comprised of the historical data for the North and South of Serbia (2005-2012) vs group consisted of the data gathered in this study for North and South (2020)
	Source of variation	df	SS	Variance components	Percentage of variation
	Among data sets	1	9.768	0.03026	8.12 (p=0.33109)
	Among localities in data sets	2	3.106	0.0089	2.39 (p=0.00000)
	Within localities	548	182.715	0.33342	89.49 (p=0.00000)
	Total	551	195.589	0.37258
b) two groups - comprised of the historical data for the North of Serbia (2005-2012) vs group consisted of the data gathered in this study for North (2020)
	Source of variation	df	SS	Variance components	Percentage of variation
	Among data sets	1	7.202	0.04661	12.48 (p=00.00000)
	Within localities	296	96.758	0.32688	87.52
	Total	297	103.96	0.3735
c) two groups - comprised of the historical data for the South of Serbia (2005-2012) vs group consisted of the data gathered in this study for South (2020)
	Source of variation	df	SS	Variance components	Percentage of variation
	Among data sets	1	2.937	0.02096	5.79 (p=00.00030)
	Within localities	252	85.957	0.3411	94.21
	Total	253	88.894	0.36206

## Sheet: S9
Table S8. Correlation between the positioning of the populations in the MDS and PCA plots with the geographical centroids of the countries from which the analyzed populations originate
a) Corelation for the Figure 4
		Lat	long	Coordinate 1	Coordinate 2
	Lat	1
	long	0.0851078	1
	Coordinate 1	0.637826	-0.228163	1
	Coordinate 2	-0.154766	-0.409432	-3.33206e-07	1
b) Corelation for the Figure 5
		Lat	long	Coordinate 1	Coordinate 2
	Lat	1
	long	0.0699876	1
	Coordinate 1	-0.575626	0.22281	1
	Coordinate 2	0.106075	0.396183	5.57714e-06	1
c) Corelation for the Figure 6
		Lat	long	PC 1	PC 2
	Lat	1
	long	0.0851078	1
	PC 1	-0.687168	0.150848	1
	PC 2	-0.401861	-0.585588	6.22254e-06	1
d) Corelation for the Figure S2
		Lat	long	Coordinate 1	Coordinate 2
	Lat	1
	long	0.0834999	1
	Coordinate 1	0.632457	-0.144584	1
	Coordinate 2	-0.0794523	0.326309	-1.78751e-07	1
e) Corelation for the Figure S3
		Lat	long	Coordinate 1	Coordinate 2
	Lat	1
	long	0.0549009	1
	Coordinate 1	-0.517837	0.270193	1
	Coordinate 2	0.17213	0.30066	6.31082e-06	1
f) Corelation for the Figure S4
		Lat	long	PC 1	PC 2
	Lat	1
	long	0.0834999	1
	PC 1	0.646192	-0.169328	1
	PC 2	-0.278828	-0.273818	-0.002829	1
g) Corelation for the Figure S5
		Lat	long	PC 1	PC 2
	Lat	1
	long	0.0549009	1
	PC 1	-0.582205	0.13482	1
	PC 2	0.44049	0.518396	-0.0112069	1
